# Supplementary material for: Large-scale forcing of the European Slope Current and associated inflows to the North Sea
Source: Copernicus journal article supplement (doi:10.5194/os-13-315-2017), 2017-04-21
Supplement: Supplementary file 1 [file os-13-315-2017-supplement.pdf]

Supplement of Ocean Sci., 13, 315–335, 2017  
<http://www.ocean-sci.net/13/315/2017/>  
doi:10.5194/os-13-315-2017-supplement  
© Author(s) 2017. CC Attribution 3.0 License.



*Supplement of*

## **Large-scale forcing of the European Slope Current and associated inflows to the North Sea**

**Robert Marsh et al.**

*Correspondence to:* Robert Marsh ([rma@noc.soton.ac.uk](mailto:rma@noc.soton.ac.uk))

The copyright of individual parts of the supplement might differ from the CC-BY 3.0 licence.

1  
2  
3  
4 **Figure S1. Particle density maps ( $0.5^\circ \times 0.5^\circ$  resolution) for all ensembles of forward**  
5 **trajectories starting on 1 July, 1988-2007. The logarithmic scale for density, ranging**  
6 **from -4 to -1, equates to 0.01-10% of all particle positions.**

7 **Figure S2. Particle age maps (binned at  $0.5^\circ \times 0.5^\circ$  resolution) for all ensembles of**  
8 **forward trajectories starting on 1 July, 1988-2007 (days since 1 July).**

9 **Figure S3. Particle salinity maps (binned at  $0.5^\circ \times 0.5^\circ$  resolution) for all ensembles of**  
10 **forward trajectories starting on 1 July, 1988-2007 (days since 1 July).**

11 **Figure S4. As Fig. S1, for backward trajectories.**

12 **Figure S5. As Fig. S2, for backward trajectories.**

13 **Figure S6. Monthly-mean transport at the three Slope Current sections and the JONSIS**  
14 **section.**

15 **Figure S7. (a) mean absolute dynamic topography (MADT); (b) mean  $\sigma_0$  at 500m; (c)**  
16 **meridional gradient of MADT, i.e., the left hand side of Eq. (7); (d) meridional gradient**  
17 **of  $\sigma_0$ , scaled by  $-H/\rho$  (nominally  $1027 \text{ m}/1027 \text{ kg m}^{-3}$ ) i.e., the right hand side of Eq. (7).**

18 **Figure S8. Potential density ( $\sigma_0$ ) at 500 m, 1-5 January biennially, 1988-2006, ORCA12-**  
19 **N01.**

20 **Figure S9. Potential density ( $\sigma_0$ ) at 947 m, 1-5 January biennially, 1988-2006, ORCA12-**  
21 **N01.**

22 **Figure S10. Monthly salinity at the four sections over 1980-2016, sampling NCEP Global**  
23 **Ocean Data Assimilation System (GODAS) analysis fields.**

24 **Figure S11: Monthly salinity anomalies at the four sections over 1980-2016, obtained by**  
25 **subtracting climatological seasonal cycles from the time series in Fig. S10.**

26 **Figure S12. Comparison of ORCA12-N01 and ORCA12-N06 hindcasts over 1988-2007:**  
27 **5-day averages of sea level difference, Lerwick minus Torshavn (top panel); ORCA12-**  
28 **N01 minus ORCA12-N06 differences (middle panel); scatterplot of individual sea level**  
29 **differences.**

30



1  
 2 **Figure S1. Particle density maps ( $0.5^\circ \times 0.5^\circ$  resolution) for all ensembles of forward**  
 3 **trajectories starting on 1 July, 1988-2007. The logarithmic scale for density, ranging**  
 4 **from -4 to -1, equates to 0.01-10% of all particle positions.**



1  
 2 **Figure S2. Particle age maps (binned at  $0.5^\circ \times 0.5^\circ$  resolution) for all ensembles of**  
 3 **forward trajectories starting on 1 July, 1988-2007 (days since 1 July).**



1  
2  
3  
4

**Figure S3. Particle salinity maps (binned at 0.5° x 0.5° resolution) for all ensembles of forward trajectories starting on 1 July, 1988-2007 (days since 1 July).**



1  
 2 **Figure S4.** As Fig. S1, for backward trajectories.



1  
2  
3

Figure S5. As Fig. S2, for backward trajectories.



1  
2  
3  
4  
5

**Figure S6. Monthly-mean transport at the three Slope Current sections and the JONSIS section.**



1  
2  
3  
4  
5

Figure S7. (a) mapped absolute dynamic topography (MADT); (b) mean  $\sigma_0$  at 500m; (c) meridional gradient of MADT, i.e., the left hand side of Eq. (7); (d) meridional gradient of  $\sigma_0$ , scaled by  $-H/\rho$  (nominally  $1027 \text{ m}/1027 \text{ kg m}^{-3}$ ) i.e., the right hand side of Eq. (7).



1

2 **Figure S8. Potential density ( $\sigma_0$ ) at 500 m, 1-5 January biennially, 1988-2006, ORCA12-**  
 3 **N01.**



1

2 **Figure S9. Potential density ( $\sigma_0$ ) at 947 m, 1-5 January biennially, 1988-2006, ORCA12-**  
 3 **N01.**



1  
 2 **Figure S10. Monthly salinity at the four sections over 1980-2016, sampling NCEP Global**  
 3 **Ocean Data Assimilation System (GODAS) analysis fields.**



1

2 **Figure S11: Monthly salinity anomalies at the four sections over 1980-2016, obtained by**  
 3 **subtracting climatological seasonal cycles from the time series in Fig. S10.**

4



1

2

3 **Figure S12. Comparison of ORCA12-N01 and ORCA12-N06 hindcasts over 1988-2007:**  
 4 **5-day averages of sea level difference, Lerwick minus Torshavn (top panel); ORCA12-**  
 5 **N01 minus ORCA12-N06 differences (middle panel); scatterplot of individual sea level**  
 6 **differences.**
